# Supplementary material for: Synthesis of a well-dispersed CaFe2O4/g-C3N4/CNT composite towards the degradation of toxic water pollutants under visible light
Source: Royal Society of Chemistry journal article supplement (doi:10.1039/c9ra05005a), 2019-01-01
Supplement: c9ra05005a1.pdf [file c9ra05005a1.pdf]

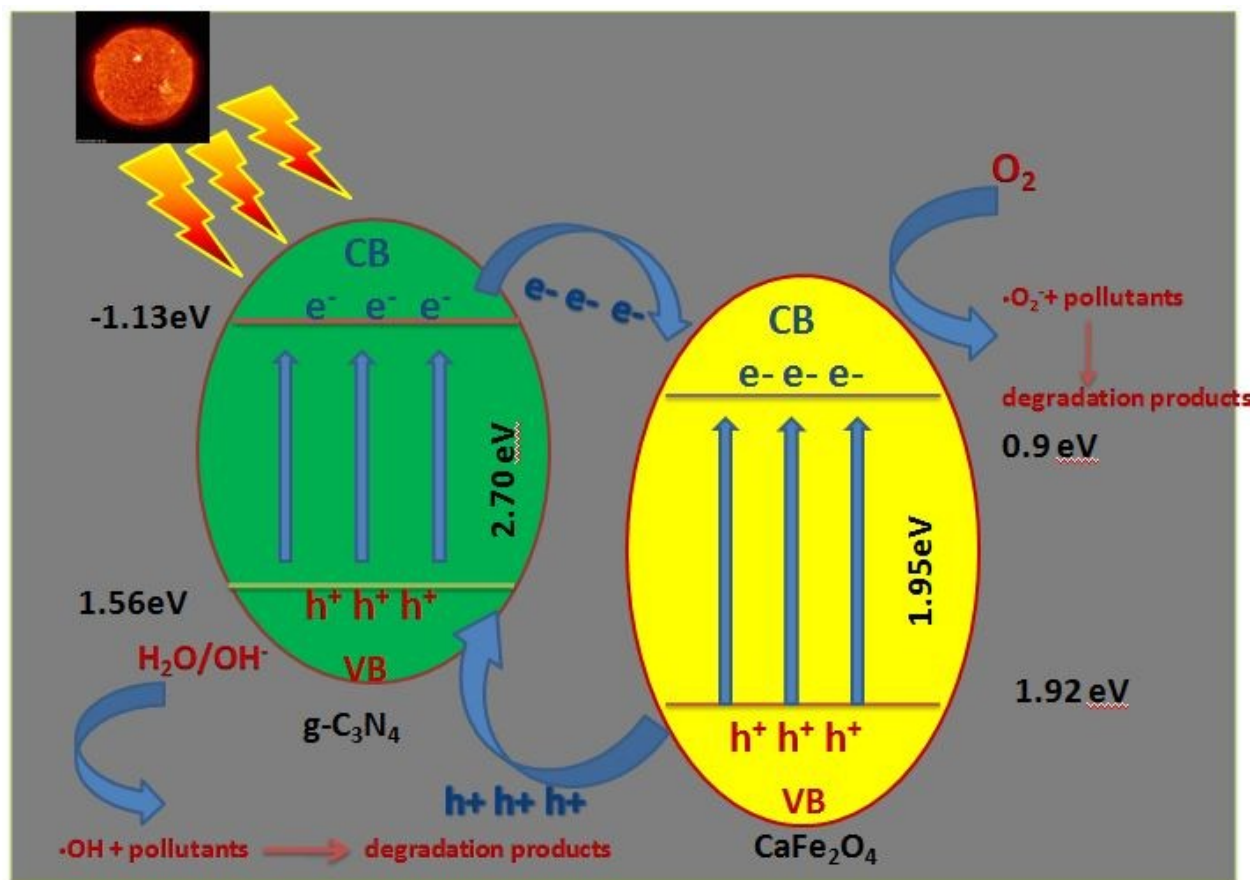

Fig.S1
